# Supplementary material
Source: PubMed Central journal article supplement (PMC7717108)
Supplement: NIHMS1615033-supplement-1.pdf [file NIHMS1615033-supplement-1.pdf]

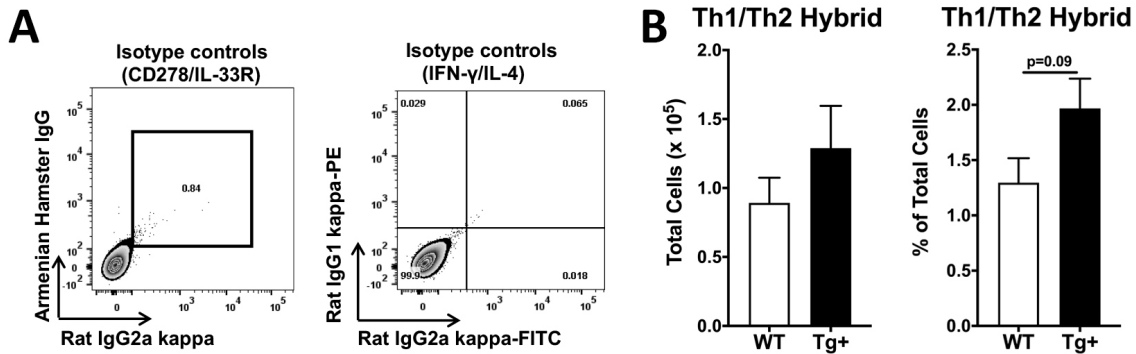

**Supplemental Figure 1**

**Supplemental Figure 1:** Scatter plots for isotype antibodies controls for flow cytometric analyses of ILC2 (A, left) and *Th2* cells (A, right) in Figure 1. Total counts for *Th1/Th2* hybrid ( $CD3^+CD4^+IL4^+IFN\gamma^+$ ) cells (B, left) in analyzed single cell suspension from WT (white bar) and Tg+ (black bar) neonates (n=5 of mice per group). Percentage of *Th1/Th2* hybrid cells (B, right) of total lung cells from WT (white bar) and Tg+ (black bar) juveniles. Error bars represent SEM. Student *t* test was used to determine significant difference between WT and Tg+ groups.

### A ILC1 (CD45+Lin-NK1.1+CD127+RORrt-Eomes-)

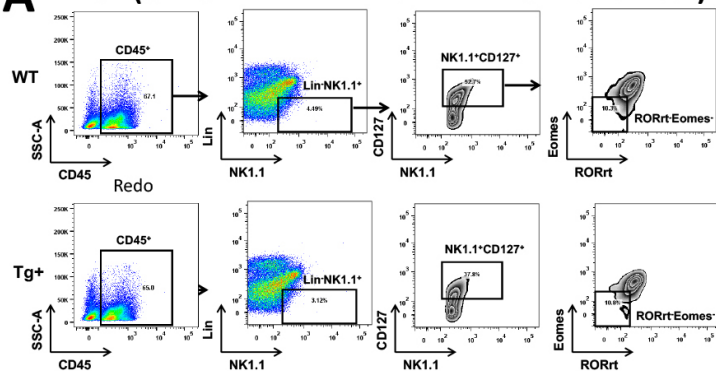

#### ILC1

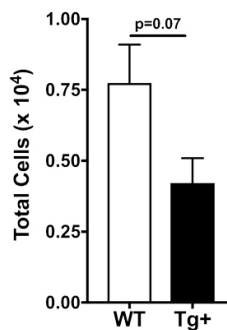

#### ILC1

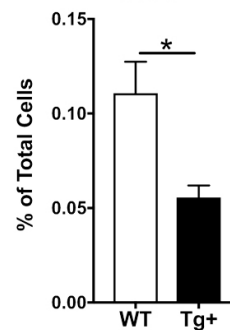

### B ILC3 (CD45+Lin-CD127+CD90+RORrt+)

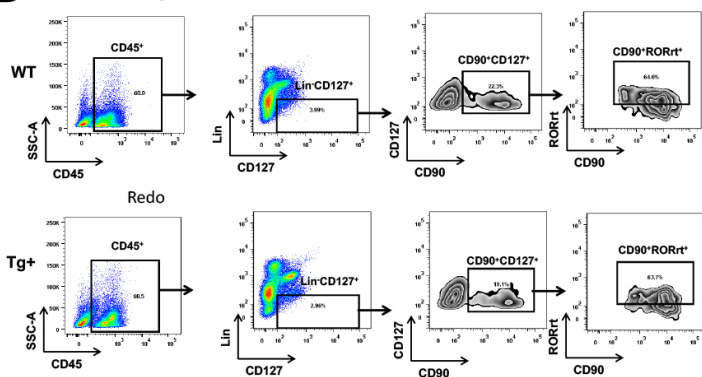

#### ILC3

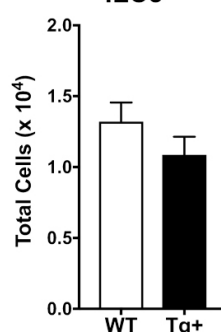

#### ILC3

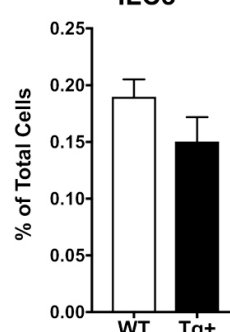

### C Th1 (CD3+CD4+IFNγ+) or Th17 (CD3+CD4+IL17+)

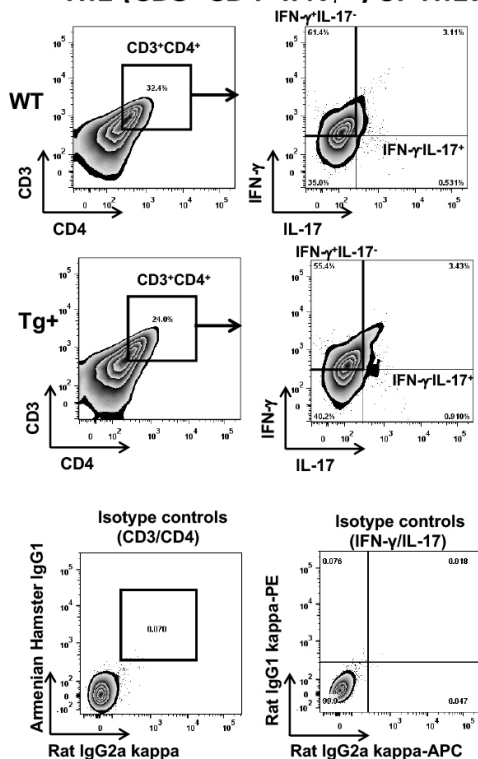

#### Th1

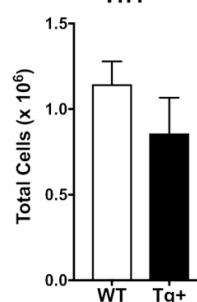

#### Th1

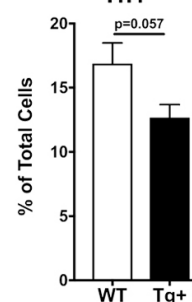

#### Th17

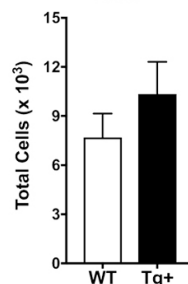

#### Th17

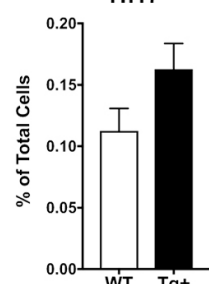

Supplemental Figure 2

**Supplemental Figure 2:** Immune cell characterization in the lungs of 10-day old WT and Tg+ littermates: Gating Strategy and representative scatter plots for flow cytometric characterization of ILC1 (CD45<sup>+</sup>Lin<sup>-</sup>NK1.1<sup>+</sup>CD127<sup>+</sup>RORrt<sup>+</sup>EOMES<sup>-</sup>) in whole lung single cell suspension from WT (**A**, top panel) and Tg+ neonates (**A**, bottom panel) (n=5 of mice per group). Total counts for ILC1 (**A**, left bar graph) in whole lung single cell suspension from WT (white bar) and Tg+ (black bar) neonates (n=5 of mice per group). Percentage of ILC1 (**A**, right bar graph) in whole lung single cell suspension from WT (white bar) and Tg+ (black bar) neonates. Error bars represent SEM. \**p* < 0.05 analyzed by Student *t* test. Gating Strategy and representative scatter plots for flow cytometric characterization of ILC3 (CD45<sup>+</sup>Lin<sup>-</sup>CD127<sup>+</sup>CD90<sup>+</sup>RORrt<sup>+</sup>) in whole lung single cell suspension from WT (**B**, top panel) and Tg+ neonates (**B**, bottom panel) (n=5 of mice per group). Total counts for ILC3 (**B**, left bar graph) in whole lung single cell suspension from WT (white bar) and Tg+ (black bar) neonates (n=5 of mice per group). Percentage of ILC3 (**B**, right bar graph) in whole lung single cell suspension from WT (white bar) and Tg+ (black bar) neonates. Gating Strategy and representative scatter plots for flow cytometric characterization of *Th1* (CD3<sup>+</sup>CD4<sup>+</sup>IFN $\gamma$ <sup>+</sup>; upper left quadrant) and *Th17* (CD3<sup>+</sup>CD4<sup>+</sup>IL17<sup>+</sup>; lower right quadrant) in analyzed single cell suspension from WT (**C**, top panels) and Tg+ neonates (**C**, bottom panels) (n=5 of mice per group). Total counts for *Th1* (**C**, left bar graph, Top) in whole lung single cell suspension from WT (white bar) and Tg+ (black bar) neonates (n=5 of mice per group). Percentage of *Th1* (**C**, right bar graph, Top) in whole lung single cell suspension from WT (white bar) and Tg+ (black bar) neonates. Total counts for *Th17* (**C**, left bar graph, Bottom) in whole lung single cell suspension from WT (white bar) and Tg+ (black bar) neonates (n=5 of mice per group). Percent values in the scatter plots indicate the proportion of gated populations. Percentage of *Th17* (**C**, right bar graph, Bottom) of total lung cells from WT (white bar) and Tg+ (black bar) juveniles. Error bars represent SEM. \**p* < 0.05 analyzed by Student *t* test. ILC1, Innate lymphoid cell 1, *Th1*, T-helper 1; ILC3, Innate lymphoid cell 3; *Th17*, T-helper 17.

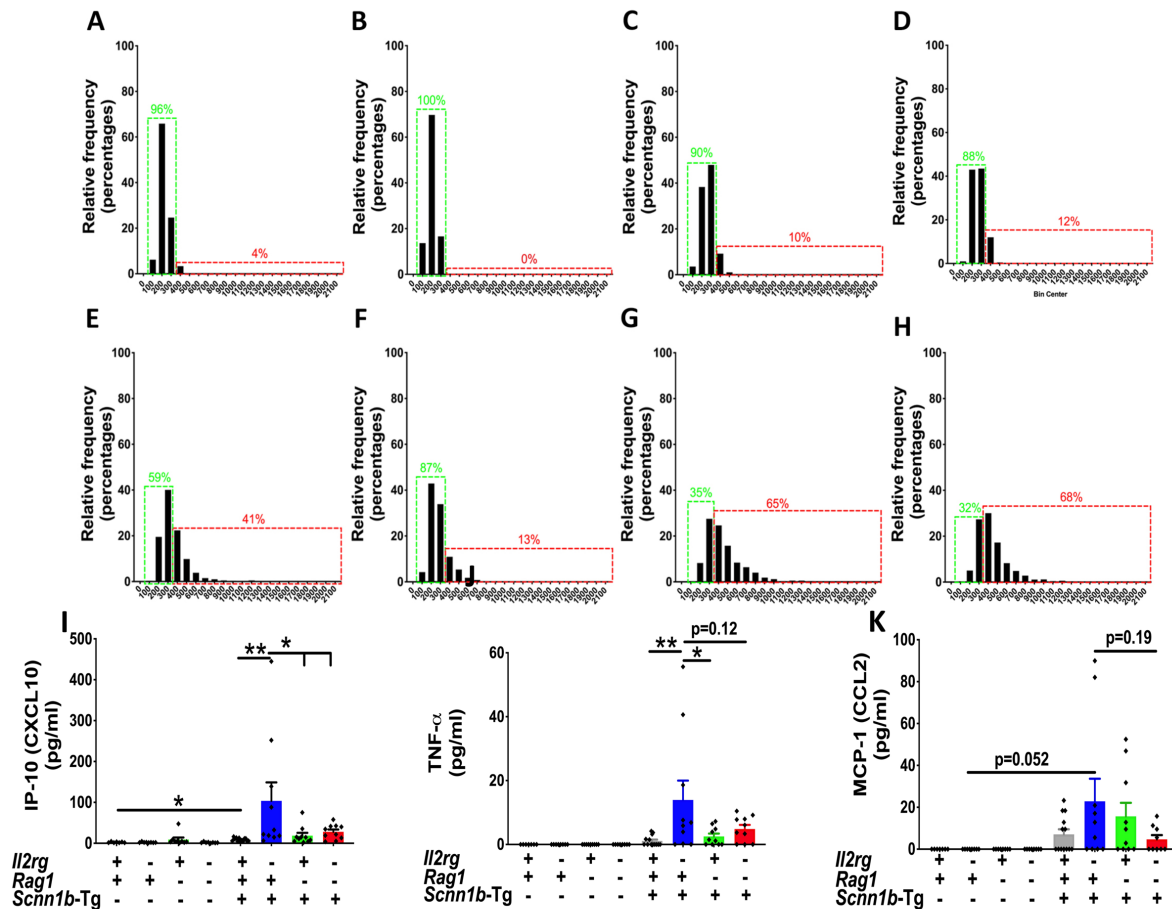

## Supplemental Fig. 3

**Supplemental Figure 3:** Macrophage size distribution of BALF macrophages from immunocompetent WT (A), *Il2rg*<sup>KO</sup>/WT (B), *Rag1*<sup>KO</sup>/WT (C), *Il2rg*<sup>KO</sup>/*Rag1*<sup>KO</sup>/WT (D), immunocompetent Tg<sup>+</sup> (E), *Il2rg*<sup>KO</sup>/Tg<sup>+</sup> (F), *Rag1*<sup>KO</sup>/Tg<sup>+</sup> (G), and *Il2rg*<sup>KO</sup>/*Rag1*<sup>KO</sup>/Tg<sup>+</sup> (H) juveniles (n=5 mice per group). BALF, Bronchoalveolar lavage fluid. Concentration (picograms/ml) of IP-10 (I), TNF- $\alpha$  (J), and MCP-1 (K) in cell-free BALF from immunocompetent WT (open gray bar, n=7), *Il2rg*<sup>KO</sup>/WT (open blue bar, n=8), *Rag1*<sup>KO</sup>/WT (open green bar, n=9), *Il2rg*<sup>KO</sup>/*Rag1*<sup>KO</sup>/WT (open red bar, n=8), immunocompetent Tg<sup>+</sup> (solid gray bar, n=13), *Il2rg*<sup>KO</sup>/Tg<sup>+</sup> (solid blue bar, n=10), *Rag1*<sup>KO</sup>/Tg<sup>+</sup> (solid green bar, n=10), and *Il2rg*<sup>KO</sup>/*Rag1*<sup>KO</sup>/Tg<sup>+</sup> (solid red bar, n=10) juveniles. Error bars represent SEM. ANOVA followed by Tukey's multiple comparison post-hoc test. \**p*<0.05; \*\**p*<0.01. IP-10, Interferon gamma induced protein-10; TNF- $\alpha$ , Tumor necrosis factor- $\alpha$ ; MCP-1, Monocyte chemoattractant protein-1.

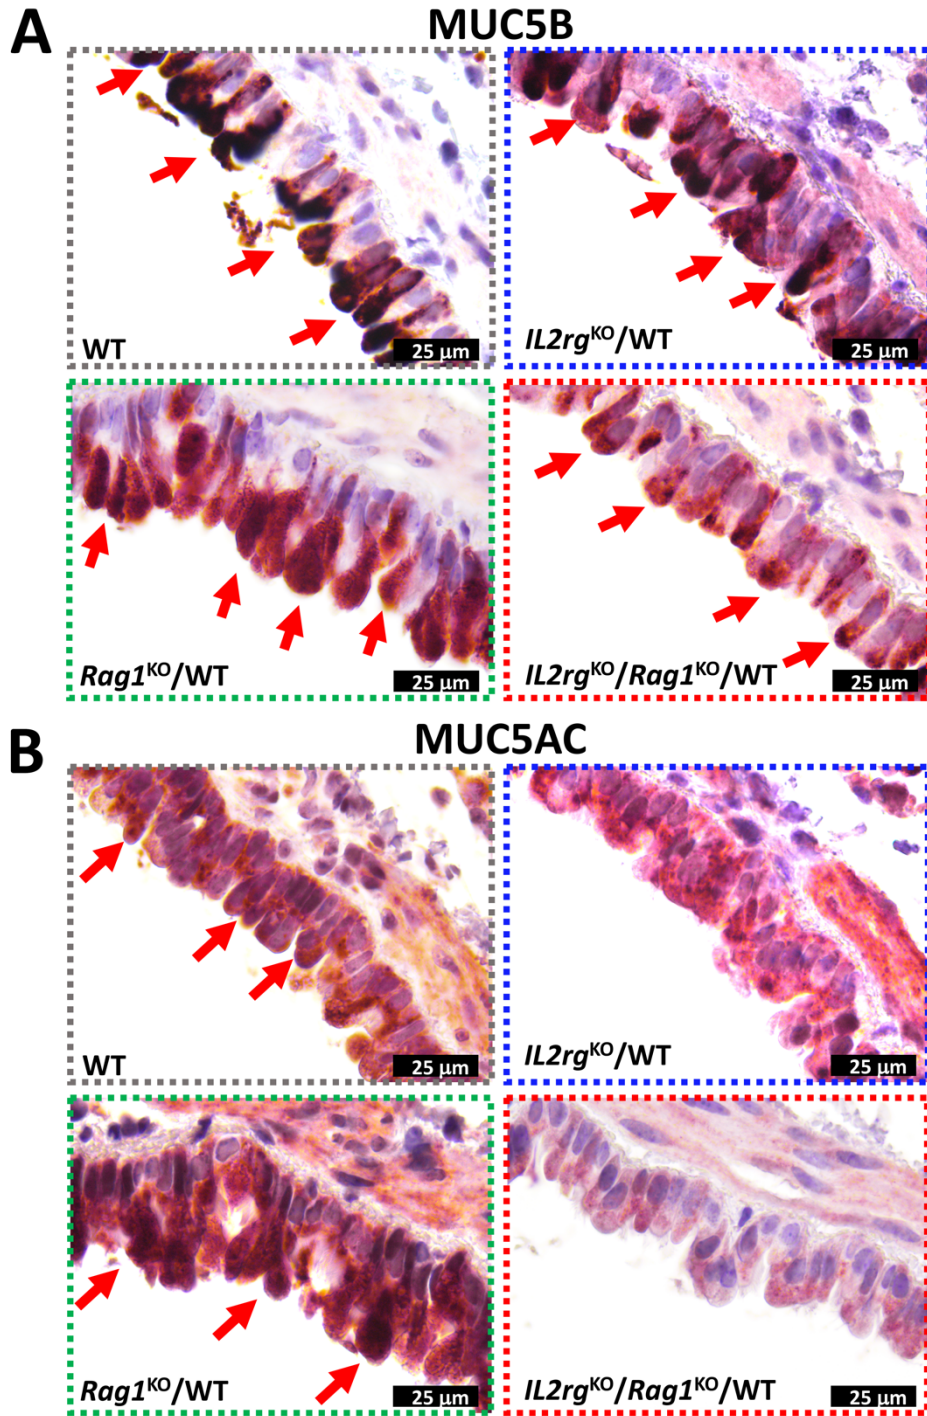

### Supplemental Fig. 4

**Supplemental Figure 4:** (A) Representative photomicrographs of MUC5B stained lung sections from immunocompetent WT,  $IL2rg^{KO}/WT$ ,  $Rag1^{KO}/WT$ , and  $IL2rg^{KO}/Rag1^{KO}/WT$  juveniles. (B) Representative photomicrographs of MUC5AC stained lung sections from immunocompetent WT,  $IL2rg^{KO}/WT$ ,  $Rag1^{KO}/WT$ , and  $IL2rg^{KO}/Rag1^{KO}/WT$  juveniles.
